# Supplementary material for: Neuraminidase Activity Modulates Cellular Coinfection during Influenza A Virus Multicycle Growth
Source: PubMed Central journal article supplement (PMC10294670; doi:10.1128/mbio.03591-22), 2023-04-20
Supplement: mbio.03591-22-s0005.pdf [file mbio.03591-22-s0005.pdf]

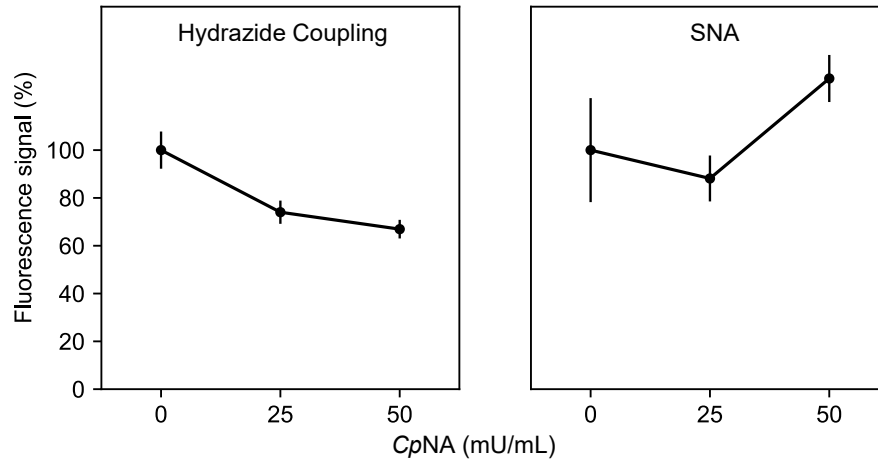

**Figure S5: Hydrizide conjugation sensitively and reproducibly reports Sia depletion by exogenous sialidase.**

Quantification of Sia levels on A549 cell monolayers treated with indicated concentrations of CpNA for 30 min at 37 °C using hydrizide coupling (left) and lectin labeling (SNA; right). Points represent mean values of three individual experiments (two for untreated group). Error bars show standard deviation.
